# Supplementary material for: Incidence and Clinical Practice of Exudative Age-related Macular Degeneration: A Nationwide Population-Based Cohort Study
Source: PubMed Central journal article supplement — Ophthalmol Sci. 2022 Mar 1;2(2):100125. doi: 10.1016/j.xops.2022.100125 (PMC9559904; doi:10.1016/j.xops.2022.100125), 2022-03-01
Supplement: mmc1.pdf [file mmc1.pdf]

**Supplemental Figure 1.** Flowchart of the process of determining new-onset active exudative AMD between 2011 and 2018

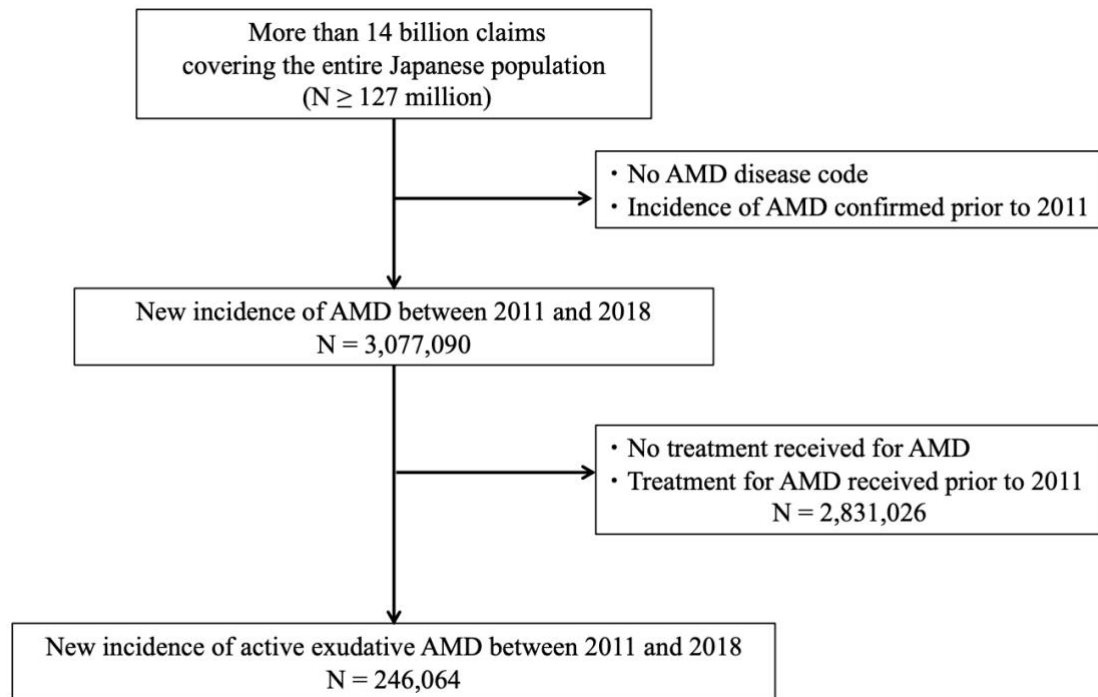

AMD: age-related macular degeneration
