# Supplementary material for: Incidence and Clinical Practice of Exudative Age-related Macular Degeneration: A Nationwide Population-Based Cohort Study
Source: PubMed Central journal article supplement — Ophthalmol Sci. 2022 Mar 1;2(2):100125. doi: 10.1016/j.xops.2022.100125 (PMC9559904; doi:10.1016/j.xops.2022.100125), 2022-03-01

## Supplemental Figure 2. Number of OCT units sold in Japan annually

The average number of OCT units sold annually between 2006 and 2018 was about 780 units (indicated by the dotted line in the graph). The number of OCT units sold increased rapidly from 2010 onwards and then decreased again after 2016. This suggests that the use of OCT increased rapidly throughout the country between 2010 and 2015. The data were provided by the Japan Ophthalmic Instruments Association.

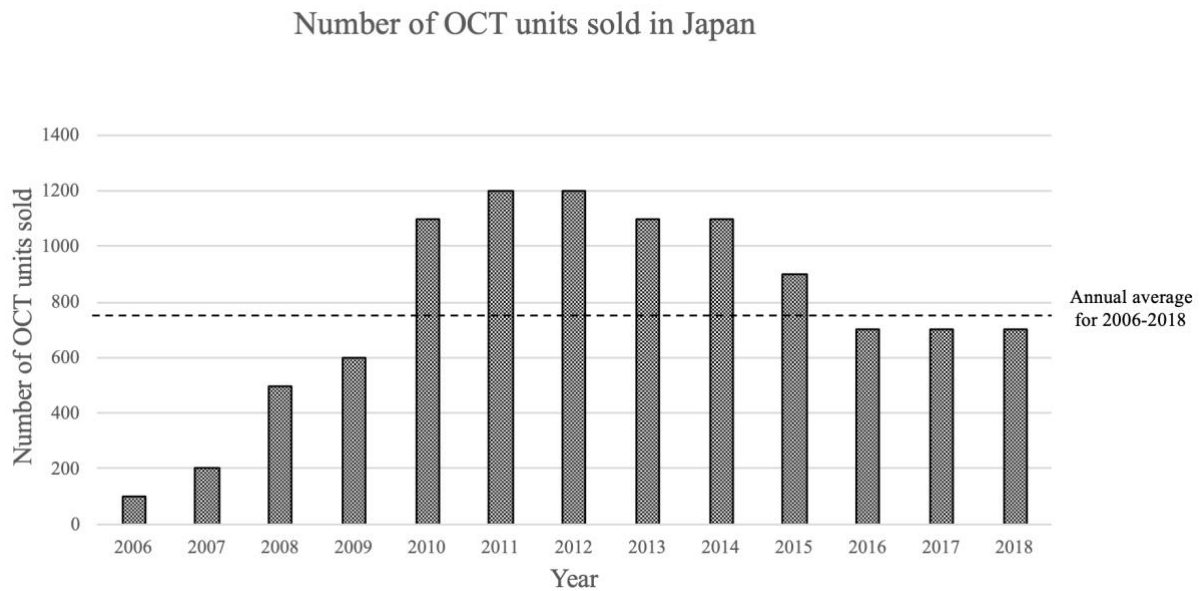

Supplement: mmc2.pdf [file mmc2.pdf]
