# Supplementary material for: Incidence and Clinical Practice of Exudative Age-related Macular Degeneration: A Nationwide Population-Based Cohort Study
Source: PubMed Central journal article supplement — Ophthalmol Sci. 2022 Mar 1;2(2):100125. doi: 10.1016/j.xops.2022.100125 (PMC9559904; doi:10.1016/j.xops.2022.100125), 2022-03-01
Supplement: mmc4.pdf [file mmc4.pdf]

**Supplemental Table 2. Correspondence Table of Codes Used in the Current Study**

## A. Diagnostic Codes for the Definition of Active Exudative AMD

| NDB Code | Disease                                                                       | ICD-10 Code |
|----------|-------------------------------------------------------------------------------|-------------|
| 8831472  | Age-related Macular Degeneration                                              | H35.3       |
| 8847490  | Exudative Age-related Macular Degeneration                                    | H35.3       |
| 8849662  | Age-related Macular Degeneration with Sub-foveal Choroidal Neovascularization | H35.3       |
| 3625014  | Macular Degeneration                                                          | H35.3       |
| 8847575  | Polypoidal Choroidal Vasculopathy                                             | H35.3       |
| 8847585  | Retinal Angiomatous Proliferation                                             | H35.3       |

## B. Diagnostic Codes for the Definition of Adverse Events

| NDB Code | Disease                           | ICD-10 Code |
|----------|-----------------------------------|-------------|
| 8841634  | Endophthalmitis                   | H44.0       |
| 3600004  | Suppurative Endophthalmitis       | H44.0       |
| 8845318  | Postoperative Endophthalmitis     | H59.8       |
| 3612001  | Idiopathic Retinal Detachment     | H33.0       |
| 8841160  | Rhegmatogenous Retinal Detachment | H33.0       |
| 3619001  | Retinal Detachment                | H33.2       |
| 3619003  | Secondary Retinal Detachment      | H33.2       |
| 3619005  | Bullous Retinal Detachment        | H33.5       |

## C. Drug Codes

| NDB Code | Drug | ATC Code |
|----------|------|----------|
|----------|------|----------|

|           |             |         |
|-----------|-------------|---------|
| 620001909 | Verteporfin | S01LA01 |
| 620008448 | Pegaptanib  | S01LA03 |
| 620009103 | Ranibizumab | S01LA04 |
| 621894901 | Ranibizumab | S01LA04 |
| 622352001 | Ranibizumab | S01LA04 |
| 622199401 | Aflibercept | S01LA05 |

#### D. Procedure Codes

| Code      | Procedure                    | ICD-9-CM Code |
|-----------|------------------------------|---------------|
| 150090610 |                              |               |
| 150274010 | Pars Plana Vitrectomy        | 14.74         |
| 150356110 |                              |               |
| 150089410 | Repair of Retinal Detachment | 14.59         |
